# Supplementary material for: Longitudinal tracing of neurochemical metabolic disorders in working memory neural circuit and optogenetics modulation in rats with vascular cognitive impairment
Source: Research Square preprint supplement (doi:10.21203/rs.3.rs-100201/v1), 2020-11-03
Supplement: Supplementary file 1 [file 29e66625f1900a62bdfc49b0.docx]

Table **S1** The correlations between the neurochemicals metabolism and behaviors after cerebral ischemia.

| Brain areas | Neurochemicals  (Fold of Cr) | Y maze | | | NOR for 1h | | | | NOR for 24h | | | |
| --- | --- | --- | --- | --- | --- | --- | --- | --- | --- | --- | --- | --- |
| r | *P* | | r | | *P* | | r | | *P* | |
| Right Hippocampus | NAA | 0.449282 | 0.002838 | | 0.384716 | | 0.011881 | | 0.344169 | | 0.025626 | |
| mI | -0.324089 | 0.036275 | | -0.364596 | | 0.017601 | | -0.267765 | | 0.086453 | |
| Cho | 0.251520 | 0.110346 | | 0.135320 | | 0.392857 | | 0.116533 | | 0.462376 | |
| Glu | -0.510083 | 0.000559 | | -0.486601 | | 0.001085 | | -0.343743 | | 0.025821 | |
| GABA | 0.321414 | 0.037934 | | 0.22621 | | 0.149721 | | 0.050683 | | 0.749909 | |
| Left Hippocampus | NAA | 0.617441 | 0.000013 | | 0.406073 | | 0.007624 | | 0.397746 | | 0.009094 | |
| mI | -0.355705 | 0.020786 | | -0.237129 | | 0.130520 | | -0.070897 | | 0.655483 | |
| Cho | 0.329695 | 0.032990 | | 0.188925 | | 0.230820 | | 0.352477 | | 0.022056 | |
| Glu | -0.362902 | 0.018174 | | -0.628246 | | 0.000008 | | -0.466189 | | 0.001860 | |
| GABA | 0.201658 | 0.200313 | | 0.310157 | | 0.045610 | | 0.173246 | | 0.272553 | |
| Right mPFC | NAA | 0.585635 | 0.000046 | | 0.299800 | | 0.053741 | | 0.386798 | | 0.011392 | |
| mI | -0.281361 | 0.159605 | | -0.239176 | | 0.127135 | | -0.192992 | | 0.220749 | |
| Cho | 0.255792 | 0.205635 | | 0.038710 | | 0.807705 | | -0.010146 | | 0.949152 | |
| Glu | -0.418259 | 0.005843 | | -0.370314 | | 0.015778 | | -0.405016 | | 0.007798 | |
| GABA | 0.386362 | 0.011493 | | 0.469267 | | 0.001718 | | 0.465541 | | 0.001891 | |
| Mediodorsal Thalamus | NAA | 0.290112 | 0.062363 | | 0.311044 | | 0.044962 | | 0.053972 | | 0.734254 | |
| mI | -0.246689 | 0.115272 | -0.240776 | | 0.124535 | | -0.260798 | | 0.095283 | |
| Cho | 0.268767 | 0.085237 | 0.128376 | | 0.417810 | | 0.031401 | | 0.843509 | |
| Glu | -0.331547 | 0.031961 | -0.545869 | | 0.000185 | | -0.499351 | | 0.000761 | |
| GABA | 0.373466 | 0.014844 | 0.365430 | | 0.017325 | | 0.270733 | | 0.082891 | |
